# Supplementary material for: Novel Nitrate Ion-Selective Microsensor Fabricated by Means of Direct Ink Writing
Source: MDPI journal article supplement (doi:10.3390/chemosensors11030174), 2023-03-04
Supplement: s1 [file s1]

*Supplementary Materials*

# Novel Nitrate Ion-Selective Microsensor Fabricated by Means of Direct Ink Writing

**Franc Paré <sup>1,2</sup>, Aida Visús <sup>1</sup>, Gemma Gabriel <sup>3,4</sup> and Mireia Baeza <sup>1,2,\*</sup>**

<sup>1</sup> Department of Chemistry, Faculty of Science, Edifici C-Nord, Universitat Autònoma de Barcelona, Carrer dels Til·lers, 08193 Bellaterra Spain

<sup>2</sup> GENOCOV Research Group, Universitat Autònoma de Barcelona, 08193 Bellaterra, Spain

<sup>3</sup> Instituto de Microelectrónica de Barcelona, IMB-CNM (CSIC), Esfera UAB, Campus Universitat Autònoma de Barcelona, 08193 Bellaterra, Spain

<sup>4</sup> Centro de Investigación Biomédica en Red de Bioingeniería, Biomateriales y Nanomedicina (CIBER-BBN)

\* Correspondence: mariadelmar.baeza@uab.cat

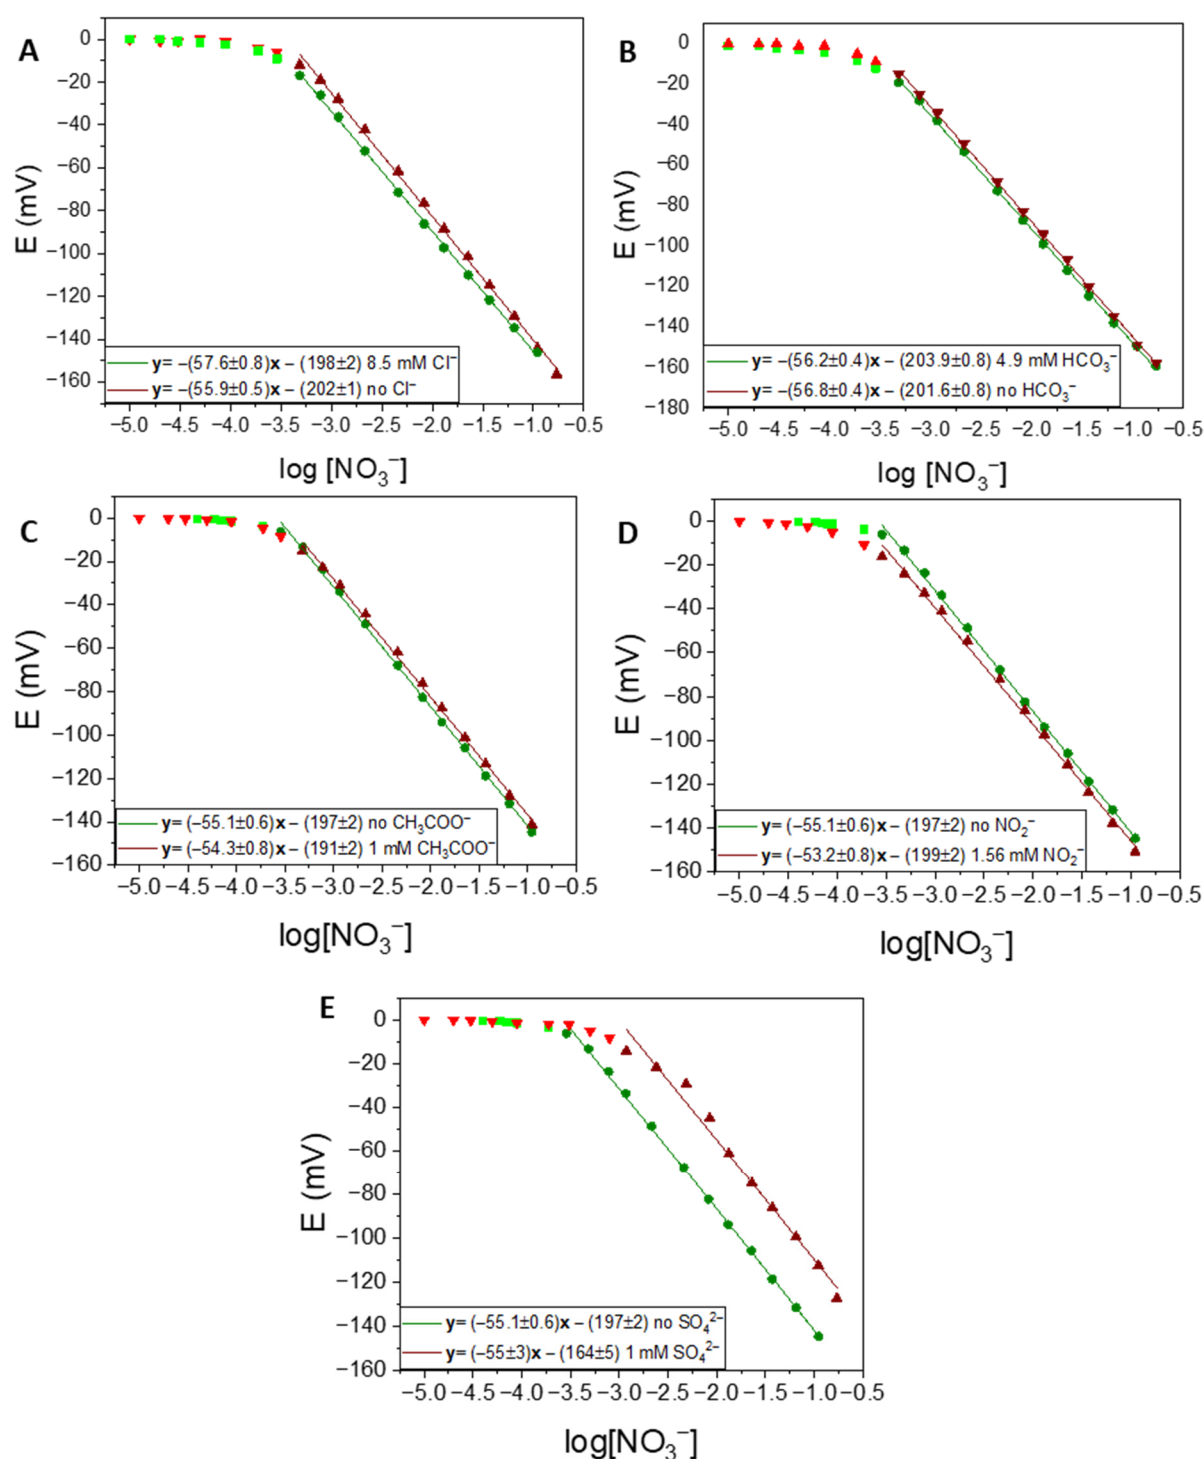

**Figure S1.** Calibrations performed of  $\text{NO}_3^-$  sensor in the presence and absence of the most likely interferents. (A) Interference study of chloride ion, green line belongs to a calibrate without  $\text{Cl}^-$  and red line to one with 8.5 mM of  $\text{Cl}^-$ . (B) Interference study of bicarbonate ion, green line belongs to a calibrate without  $\text{HCO}_3^-$  and the red line to one with 4.9 mM of  $\text{HCO}_3^-$ . (C) Interference study of nitrite ion, green line belongs to a calibrate without  $\text{NO}_2^-$  and the red line to one with 1.56 mM of  $\text{NO}_2^-$ . (D) Interference study of acetate ion, green line belongs to a calibrate without  $\text{CH}_3\text{COO}^-$  and the red line to one with 1 mM of  $\text{CH}_3\text{COO}^-$ . (E) Interference study of sulfate ion, green line belongs to a calibrate without  $\text{SO}_4^{2-}$  and the red line to one with 1 mM of  $\text{SO}_4^{2-}$ .

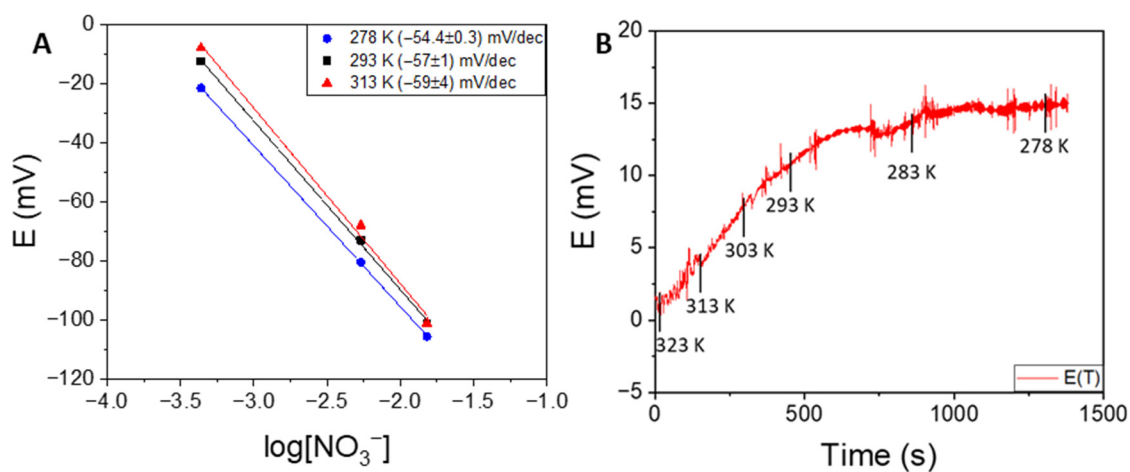

**Figure S2.** Studies of the sensor's behavior at different temperatures. (A) Change in sensitivity at three different temperatures. (B) Variation of the measured potential to 0.1 M  $\text{NO}_3^-$  as temperature changes.
